# Supplementary material for: Novel Orthoreovirus from Mink, China, 2011
Source: PubMed Central journal article supplement (PMC3840883; doi:10.3201/eid1912.130043), 2013-12
Supplement: 13-0043-Techapp-s1.pdf [file 13-0043-Techapp-s1.pdf]

# Novel Orthoreovirus from Mink, China, 2011

## Technical Appendix

Technical Appendix Table. Primers used for amplification of the genome of mink reovirus HB-A strain from China, 2011\*

| Gene, primer name | Primer sequence, 5'→3'          |
|-------------------|---------------------------------|
| L1 forward        | GCTACACGTTCCACGACAAT            |
| L1 reverse        | TGAGTTGACGCACCACGACCCA          |
| L2 forward        | ATGGCGAACGTTTGGGGAGT            |
| L2 reverse        | GATGAATTAGGCACGCTCACG           |
| L3 forward        | TAATCGTCAGGATGAAGCGGA           |
| L3 reverse        | TGAATCGGCCCAACTAGCAT            |
| M1 forward        | ATGGCTTACATCGCAGTTCCT           |
| M1 reverse        | CGTAGTCTTAGCCCGCCCC             |
| M2 forward        | TAATCTGCTGACCGTCACTC            |
| M2 reverse        | GTGCCTGCATCCCTTAACC             |
| M3 forward        | CGTGGTCATGGCTTCATTC             |
| M3 reverse        | GATGAATAGGGGTCTGGGAA            |
| S2 forward        | GCTATTCGCTGGTCAGTTATGGC         |
| S2 reverse        | GATGAATGTGTGGTCAGTCGTGAG        |
| S3 forward        | GCTAAAGTCACACCTGTCGTCGTC        |
| S3 reverse        | GATGATTAGGCGCCACCCACCAC         |
| S4 forward        | GCTATTTTTGCCTCTTCCCAAACGTTGTCTG |
| S4 reverse        | GATGAATGGAGCCTGTCCCACGTCACACC   |
| S1 forward        | GCTATTCGCGCCTATGGA              |
| S1 reverse        | GATGAAATGCCCCAGTGC              |

\*L, large; M, medium; S, small.
